# Supplementary material for: A bright idea—metabarcoding arthropods from light fixtures
Source: PeerJ journal article supplement (doi:10.7717/peerj.11841), 2021-07-26
Supplement: Fig_S1_map_CBG_v1.pdf [file Fig_S1_map_CBG_v1.pdf]

## Basement (17)

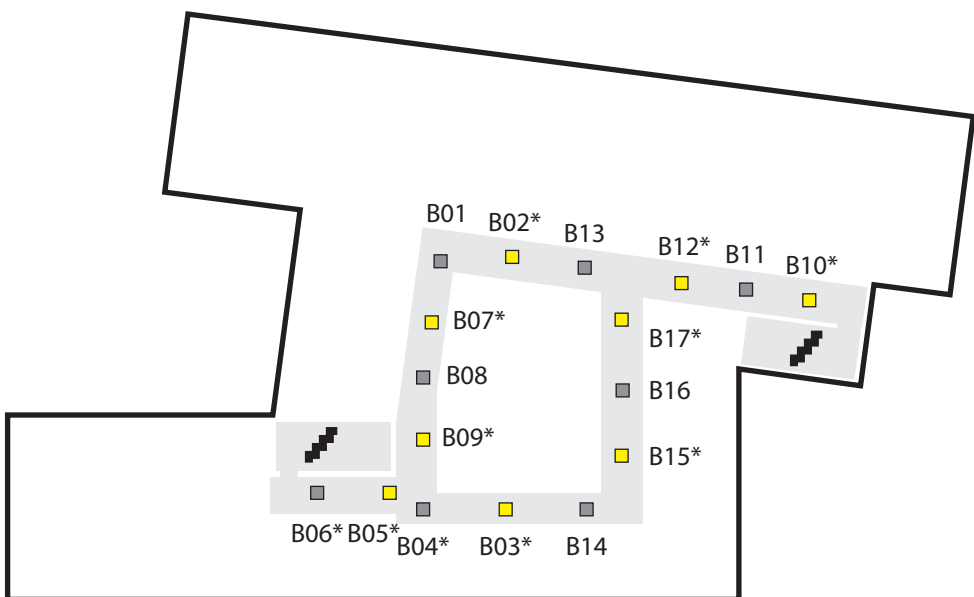

## Ground level (14)

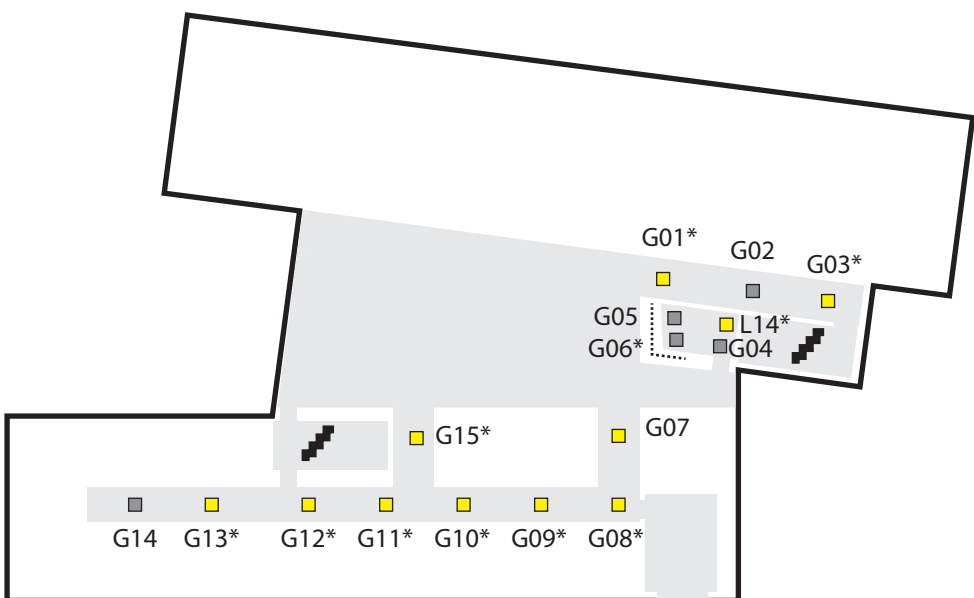

## First floor (12)

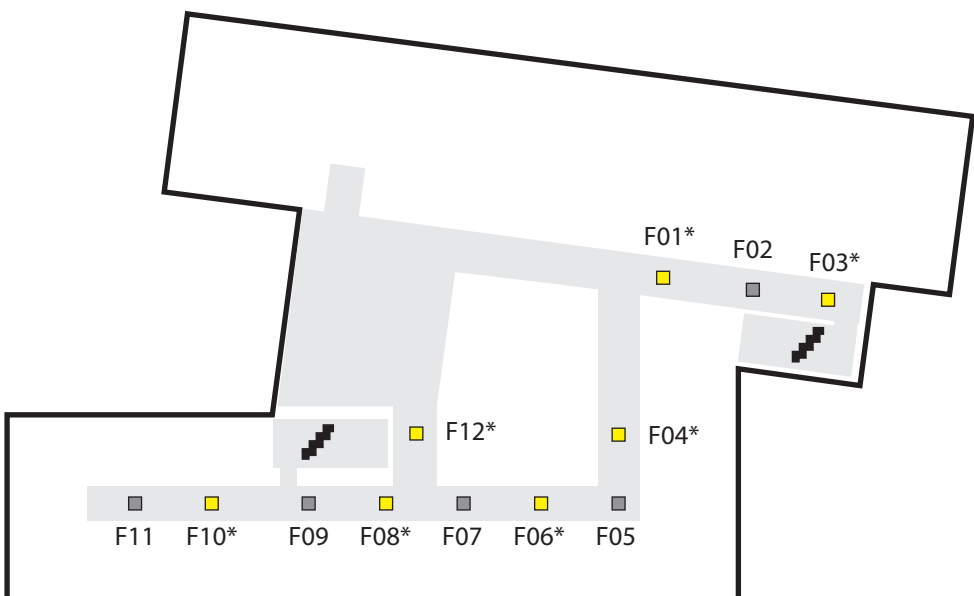

**Fig S1:** Floor plans of the CBG, with sampled light fixtures indicated by squares. Light fixtures that are turned off at night are indicated in grey, with light fixtures that remain on over night indicated in yellow. Sample IDs with an asterisk (\*) indicate samples that had a large amount of biomass and where ground in 20 ml tubes, while samples without an asterisk where ground in 2 ml tubes.
