# Supplementary material for: A bright idea—metabarcoding arthropods from light fixtures
Source: PeerJ journal article supplement (doi:10.7717/peerj.11841), 2021-07-26
Supplement: Fig_S2_light.pdf [file Fig_S2_light.pdf]

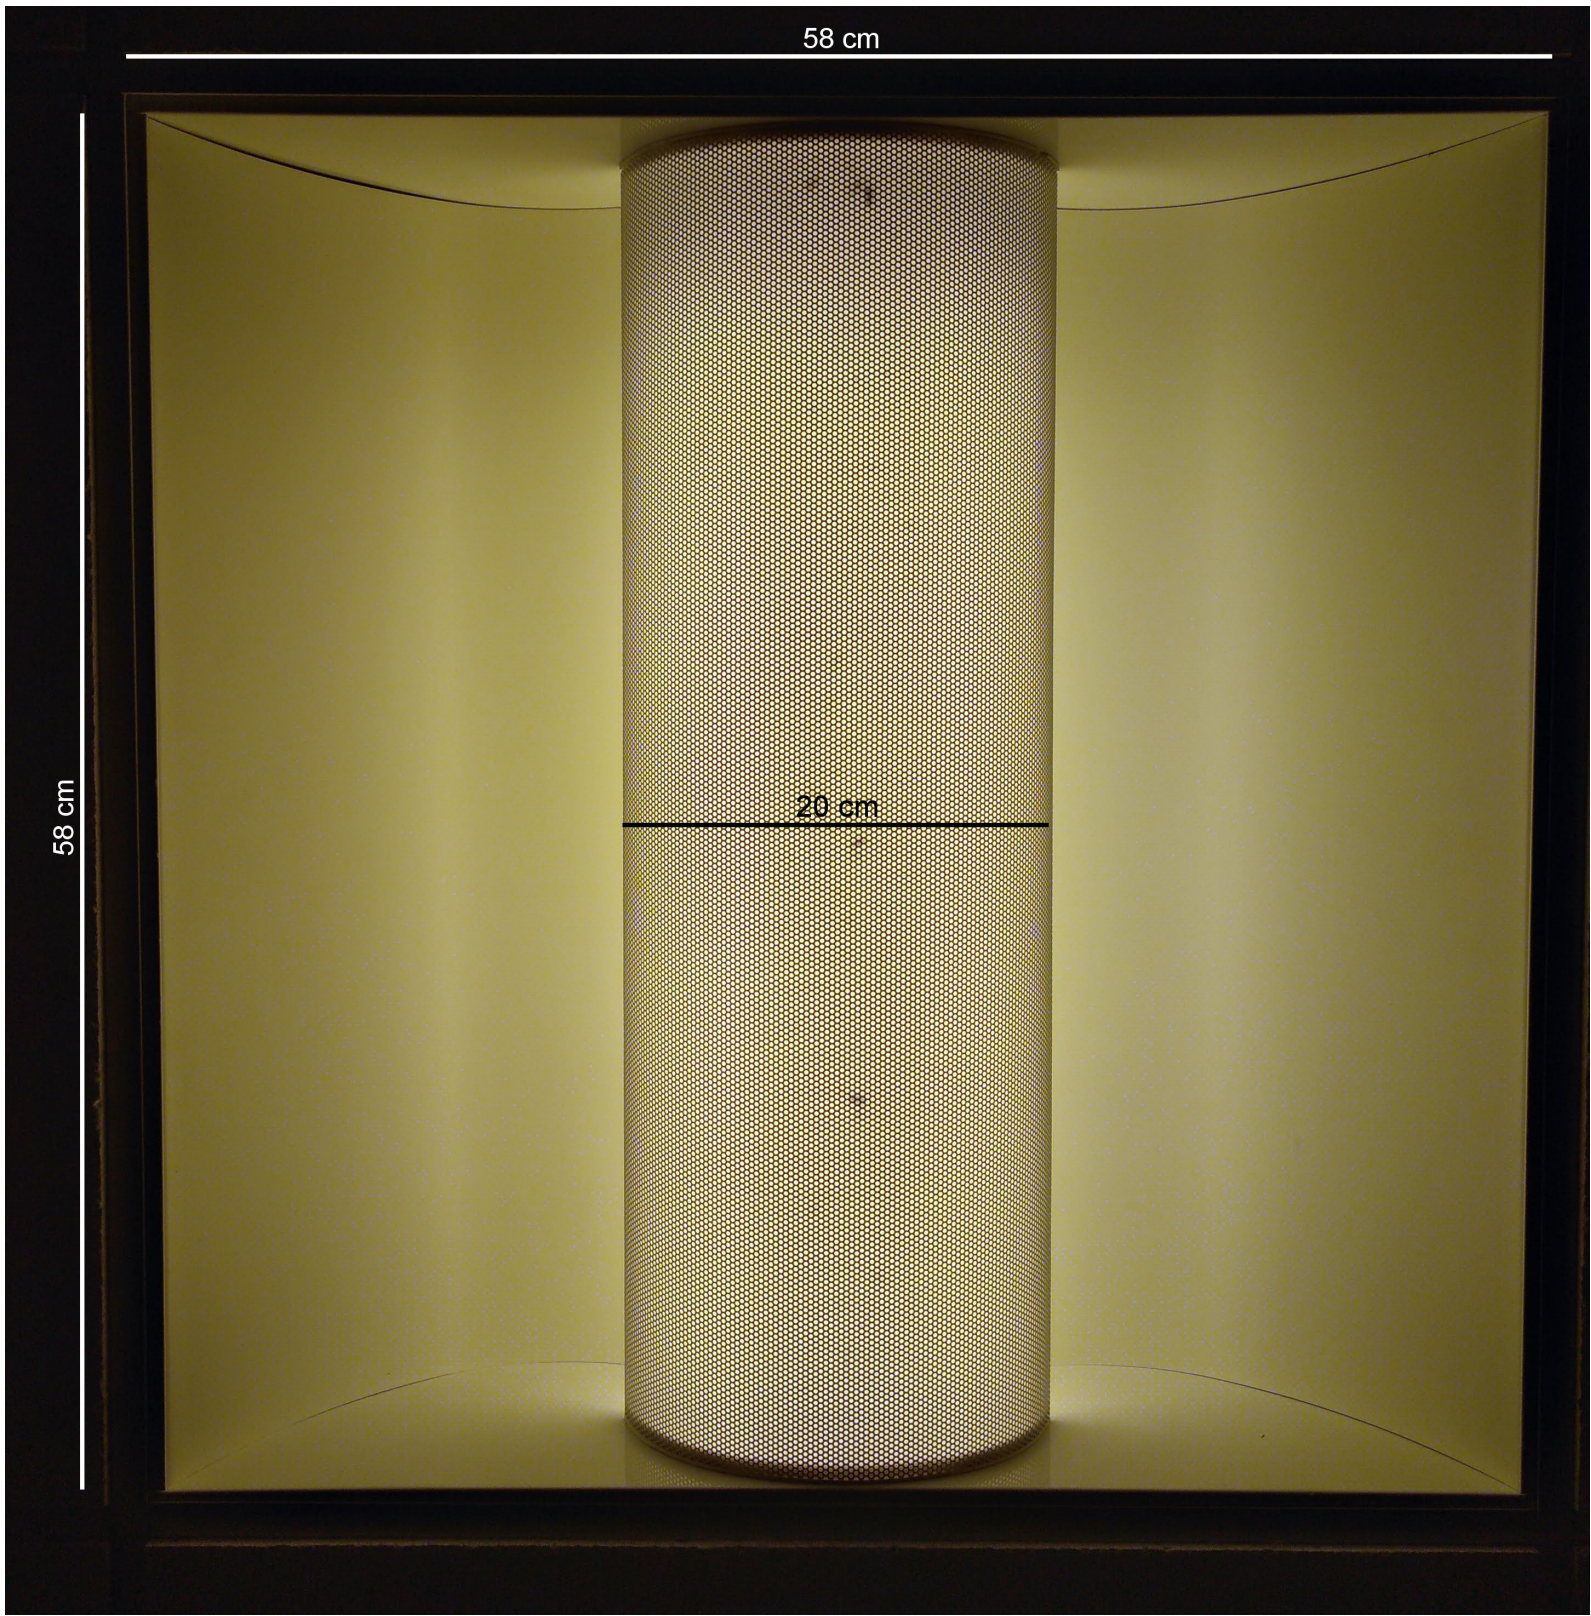

58 cm

58 cm

20 cm

Fig S1: Picture of the light fixtures at the CBG.
