# Supplementary material for: A bright idea—metabarcoding arthropods from light fixtures
Source: PeerJ journal article supplement (doi:10.7717/peerj.11841), 2021-07-26
Supplement: Fig_S3_BIO_lamps_v1.pdf [file Fig_S3_BIO_lamps_v1.pdf]

**Basement**

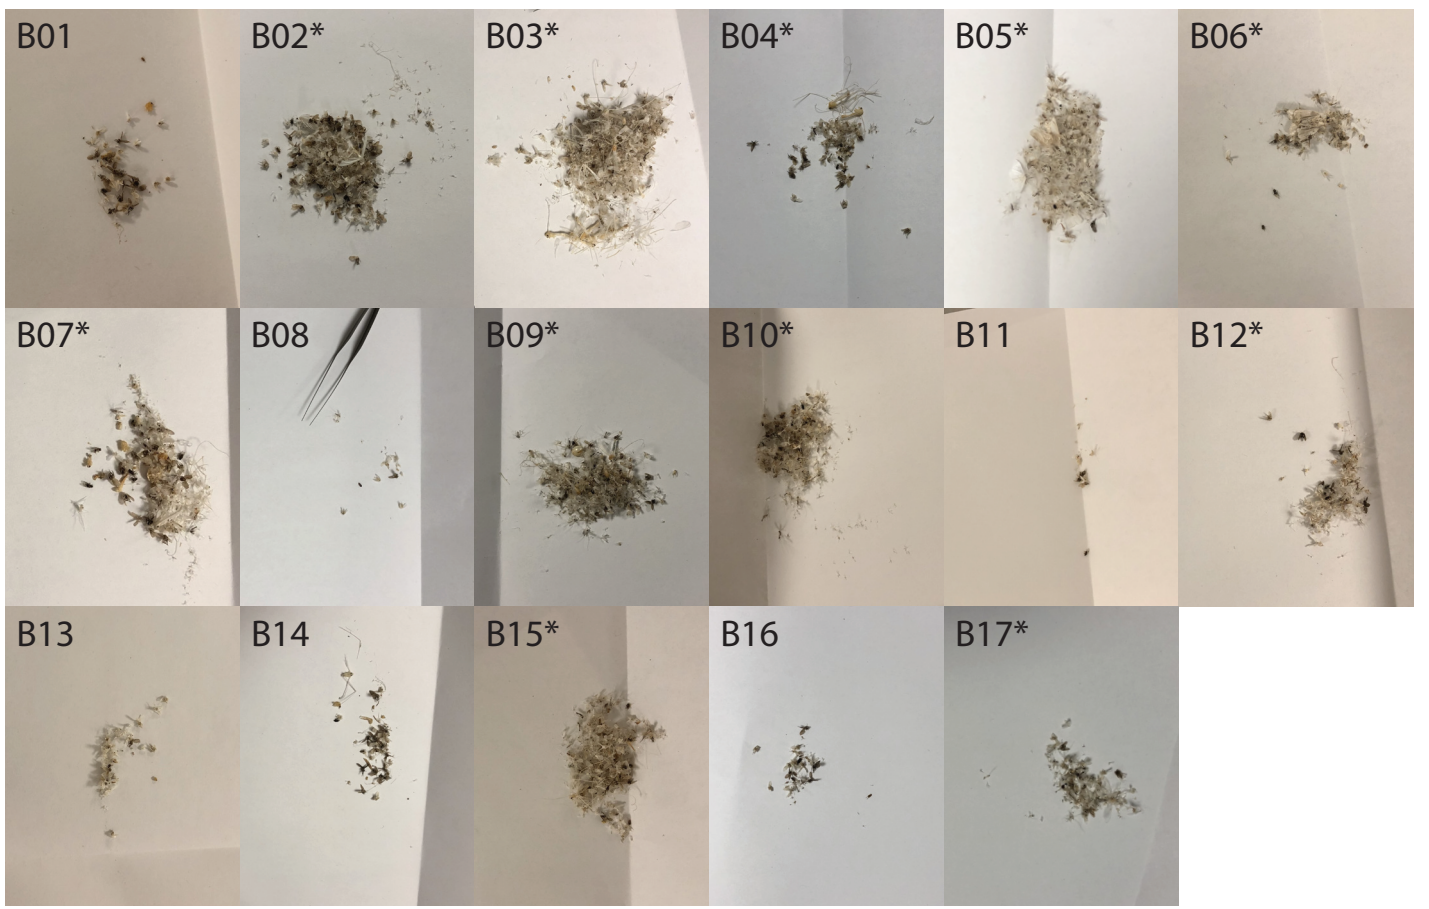

**Ground level**

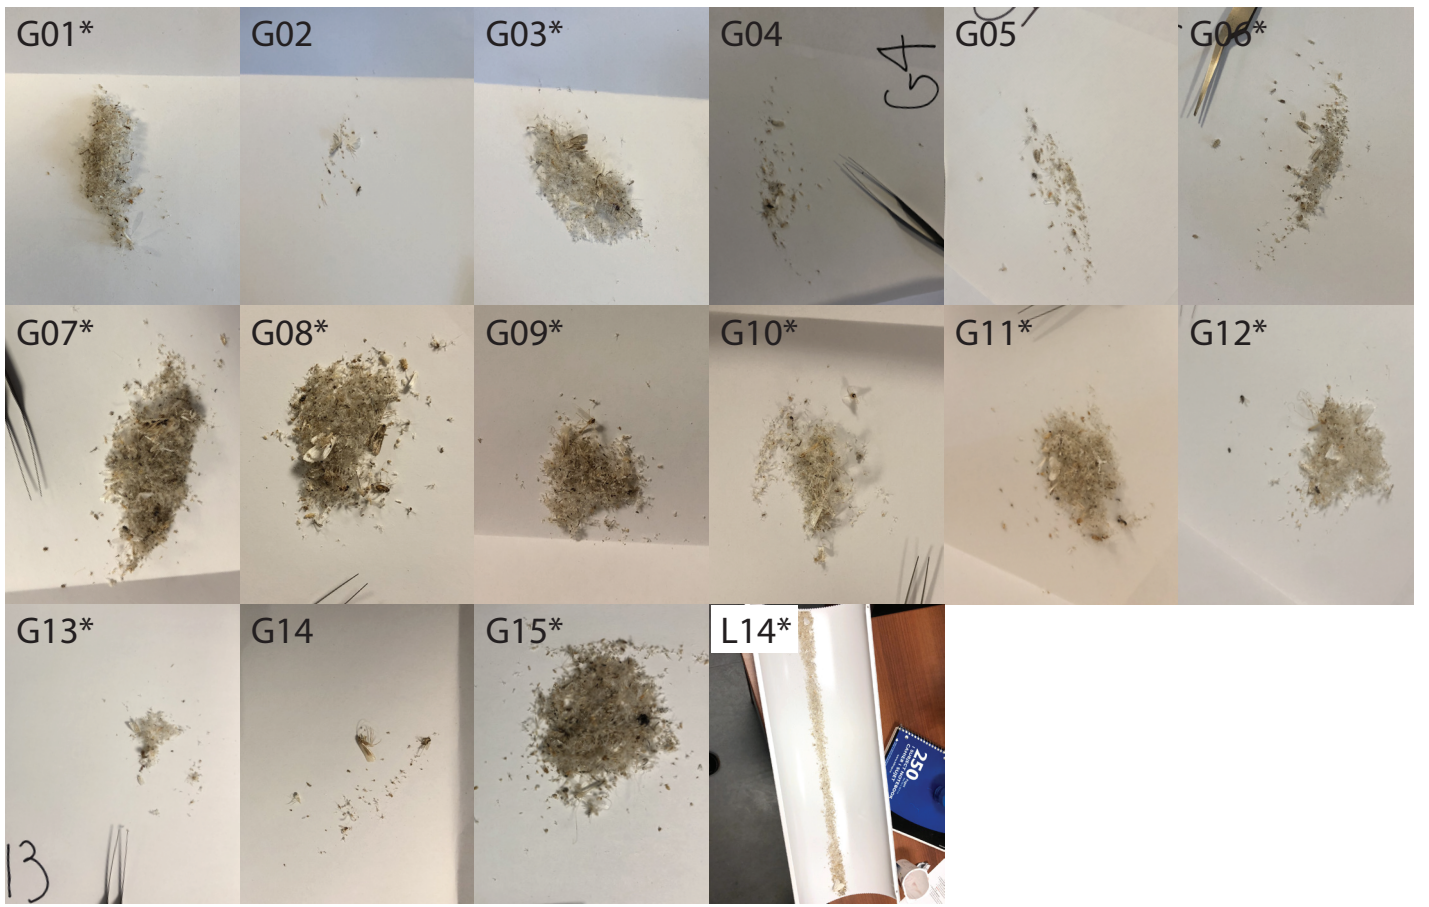

**First floor**

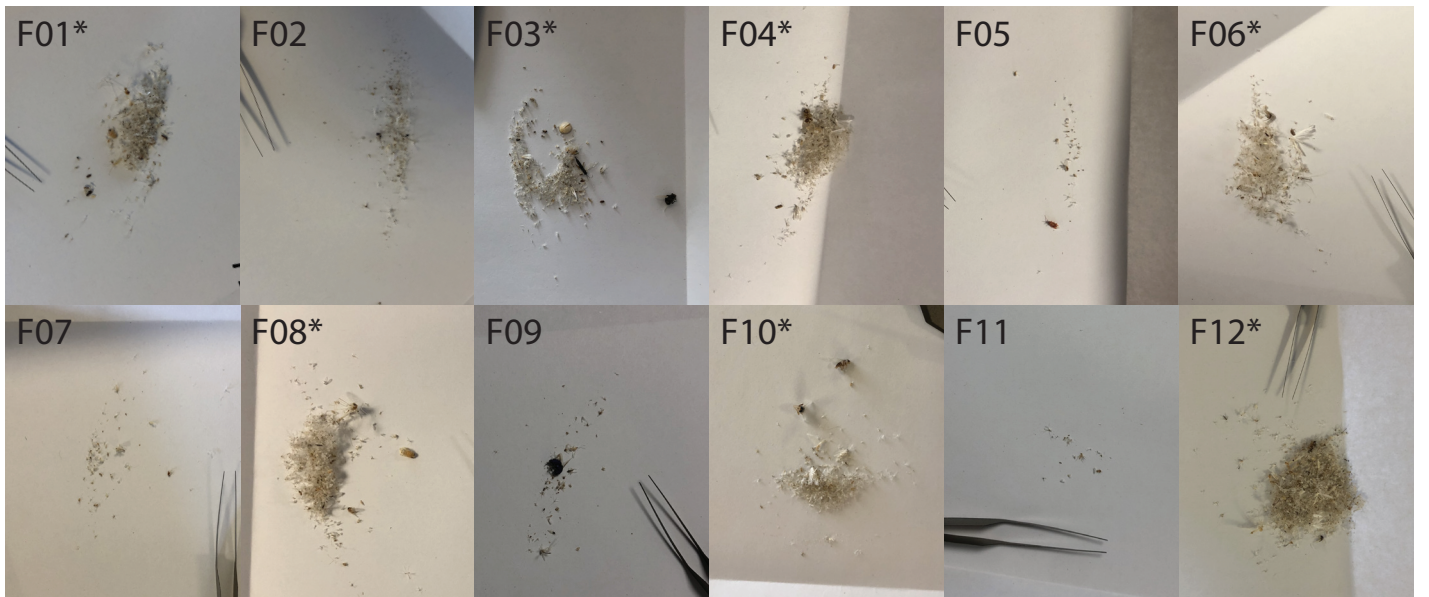

**Fig S3:** Pictures of arthropods collected at the CBG. Sample IDs marked with asterisks (\*) are ground in 20 ml tubes, ones without in 2 ml tubes.
