# Supplementary material for: A bright idea—metabarcoding arthropods from light fixtures
Source: PeerJ journal article supplement (doi:10.7717/peerj.11841), 2021-07-26
Supplement: Fig_S4_Gel_v2.pdf [file Fig_S4_Gel_v2.pdf]

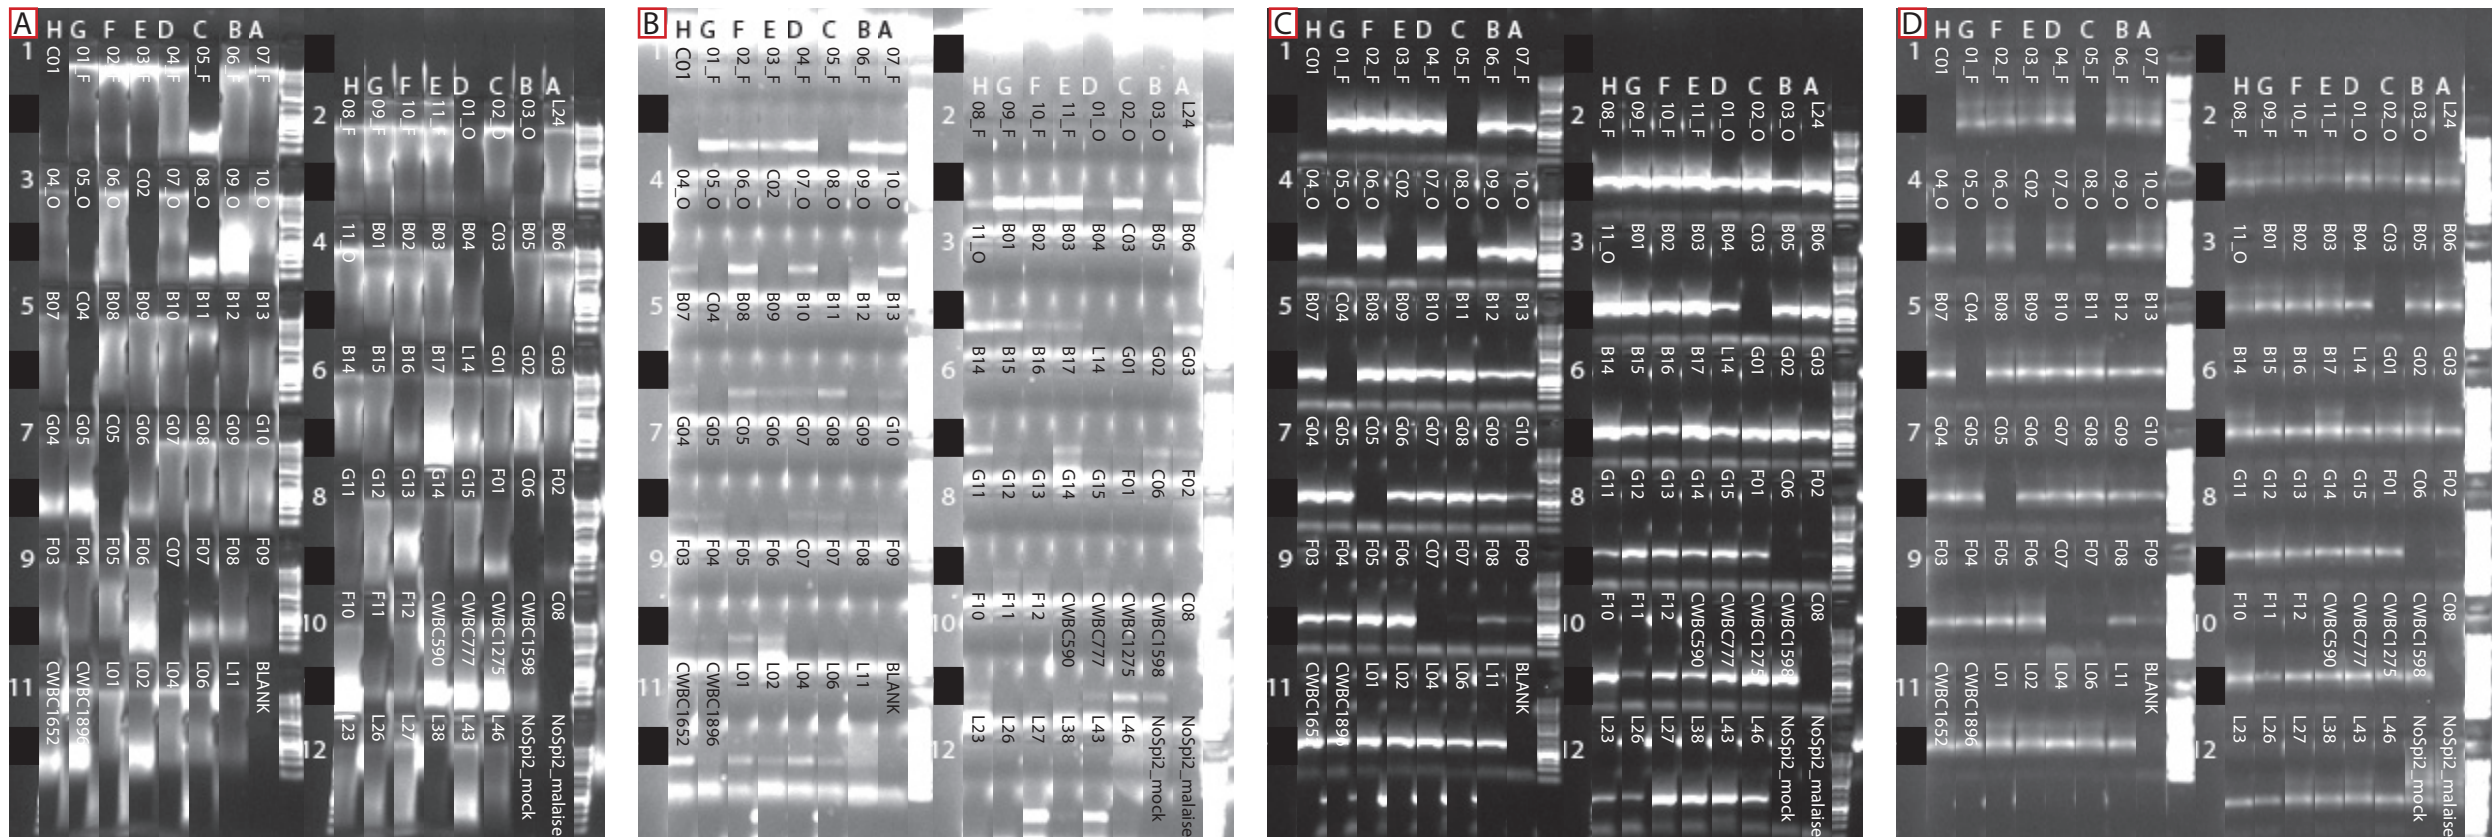

Figure S4: Agarose gel pictures of the 96 well DNA extraction (A), PCR1 (B), PCR2 (C) and normalization (D).
