# Supplementary material for: A bright idea—metabarcoding arthropods from light fixtures
Source: PeerJ journal article supplement (doi:10.7717/peerj.11841), 2021-07-26
Supplement: Fig_S6_OTU_light_difference_v2.pdf [file Fig_S6_OTU_light_difference_v2.pdf]

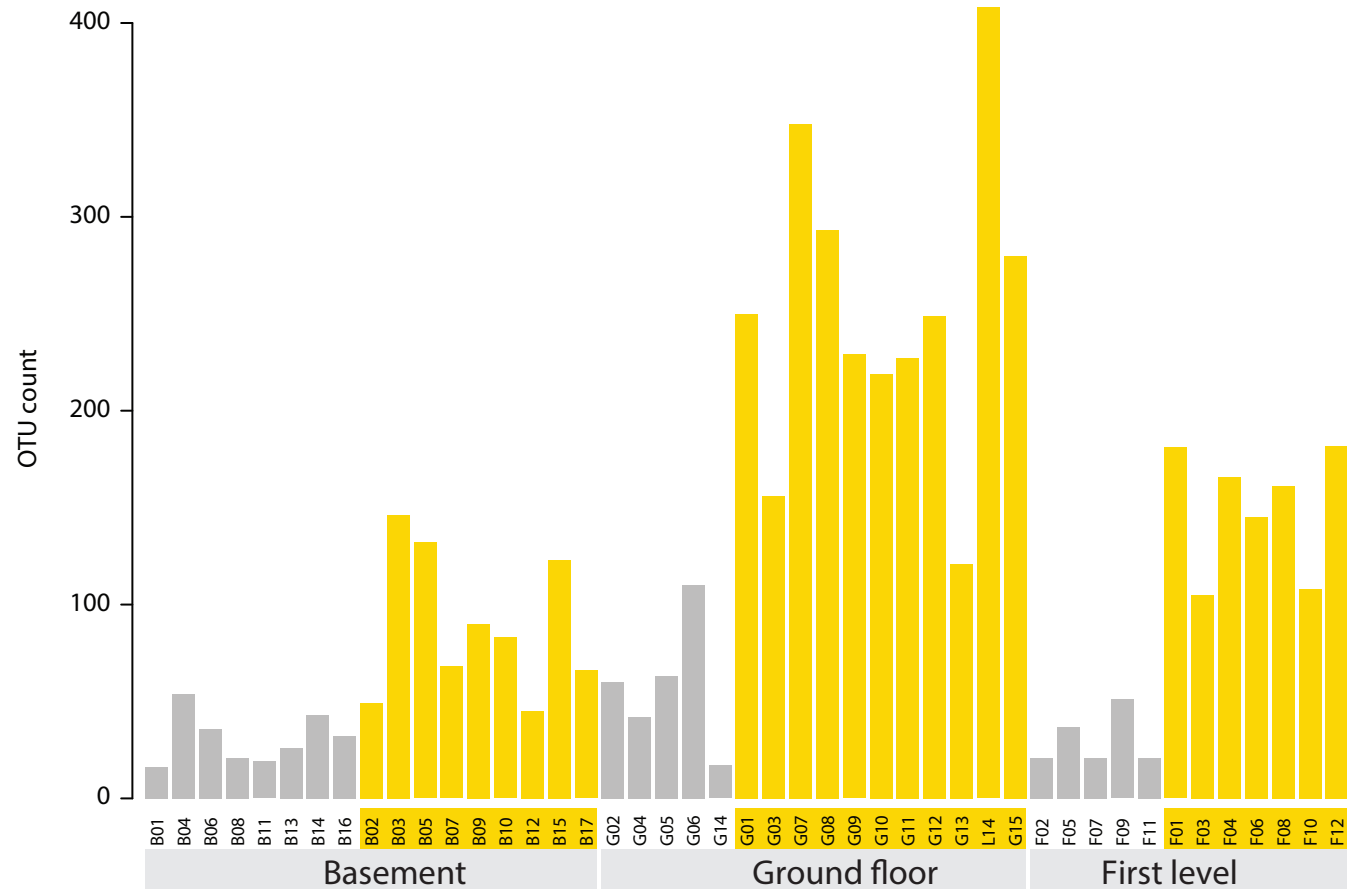

**Fig S6:** OTU counts in each sample collected at CBG. Samples highlighted in yellow indicate light fixtures that stay turned on overnight, while bars in gray indicate OTU abundance for light fixtures that are turned off overnight.
