# Supplementary material for: A bright idea—metabarcoding arthropods from light fixtures
Source: PeerJ. 2021 Jul 26;9:e11841. doi: 10.7717/peerj.11841 (PMC8320520; doi:10.7717/peerj.11841)
Supplement: Supplemental Information 8 [file peerj-09-11841-s008.xls]

## Sheet: raw_data
Sample ID	Approximate location	Aprroximately, when was the lamp last cleaned?	What room is the lamp in?	No. of Houseplants	Pets:	How often do you open the window/doors?	How often are you buying produce? What Types?	Type of lamp/lightbulb?	Notes:	grinding tube size	NCBI SRA
L01	Guelph, ON N1G 2L4	At least one year	1st floor, bed room	0	1 cat, one dog	Rarely	Once a week, coliflower, potatoes, carrots, onions	celing light, incandescent		20 ml	SRX5975492
L02	Toronto, ON M4Y 1H5	atleast 6 years	20th floor, dining area	6	2 cats	All summer	Yes, a large assortment.	Incandescent	Cats names; Sir Sarcodes Sanguinea, Lady Mitrastena Yanamotoi.	20 ml	SRX5975491
L04	Guelph, ON N1H 4E8	NA	Kitchen	2	0	Windows all summer (w/screen), Dors 2-4x per day.	Onions, peppers, tomatoes, spinach. Weekly.	LED	It's a good lamp. 3rd floor apartment building.	2 ml	SRX5975490
L06	Guelph, ON N1G 2T8	Absolutely no idea	1st floor bed room.	0	0	Daily, but there are nets in front of most windows.	weekly: apples, bananas, lemons, kiwis.	Standing lamp.		2 ml	SRX5975489
L11	Thornhill, ON L4J 7R7	1 year ago.	Kitchen- ground floor.	2	Cat, Lizard.	Frequently in spring to fall.	Every week. Banana, apple, lettuce, tomato, cucumber, broccoli.	Ceiling lamp.		2 ml	SRX5975488
L14	Centre for Biodiversity Genomics. Room 126	August 2015	Rm 126, 1st floor office.	2 office plants	No	Never	Often have coffee grounds, banana peels, and orange peels in garbage.	Fluorescent, ceiling light.	Fruit fly problem in July/Aug 2018.	20 ml	SRX5975487
L23	Guelph, ON N1L 0A7	New basement unit. First people to live in unit since it was built (Moved in in November)	Living room, basement.	0	Dog + Lizard	Almost never (haven't been here in warm weather).	Seldom. Apples and Spinach twice a month.	Domed ceiling lamp, bulb type uknown.	Because entire basement was renovated, probability only existed 6ish months. Have fun.	2 ml	SRX5975486
L24	Brampton, ON L6R 2L3	Less than a year	Entertainment room, basement	20, none in basement	None	Never in the basement	Often (usually bananas, potatoes, carrots, and celery)	Ceiling, incandescent		2 ml	SRX5975495
L26	Guelph, ON N1L 0E3	At least 2 years.	Basement, kitchen.	Yes, 1 succulent.	0	Rarely	Every week, apples, banana, romaine, carrot, tangerine, kiwi, pineapple, tomato, cucumber, avocado, eggplant, broccoli, cauliflower.	Ceiling lamp/incandescent.		2 ml	SRX5975494
L27	Georgetown, ON L7G 3V5	More than 5 years ago.	Spare bedroom, 2nd floor.	6	0	Regularly in the summer, spring, and fall	Regularly. pepepr, cucumbers, lettuce, celery.	2 60W bulbs	enclosed. Ceiling fixture with a cover. Tough to get into.	2 ml	SRX5975506
L38	Guelph, ON N1E 2G1	February of 2018	The lamp is in a bedroom, 1st floor.	18	1 dog, 1 gecko, 1 hedgehog.	Daily, multiple times a day	Every few days. Apples, bananas, clementines, avocados, berries, broccoli, spinach, onions, peppers, carrots, sweet potatoes.	It's hanging from the ceiling. Incandescent lightbulbs.	The lamp has 3 light bulbs & a dish shaped cover. There is a large window in the same room.	2 ml	SRX5975507
L43	Rodney, ON N0L 2C0	2016	Kitchen, Main floor.	2 Aloe vera plants in Kitchen.	1 barn cat, occasionally let inside.	Frequently (open in the summer)	Regularly, (once a week), bananas, apples, root vegetables, strawberries, rubus spp., lemons, limes, pineapple, romaine lettuce, bell peppers, cucumbers, celery.	Pendant lamp. 3 6 watt "warm" cf1 bulbs.	Lamp is located about 1.5 m from side door which is open (with a screen) in the summer.	2 ml	SRX5975508
L46	Guelph, N1H 3L6	More than 2 years.	Kitchen, 2nd floor.	Yes. 5.	Yes!!! 2 dogs.	Every day in the summer	Weekly. Apples, peppers, zucchini, potatoes, banana.	Ceiling fan. Incandescent.	This is a very nice lamp. The lightbulb actually just burnt out during the collection of this sample.	2 ml	SRX5975509
