# Supplementary material for: A bright idea—metabarcoding arthropods from light fixtures
Source: PeerJ. 2021 Jul 26;9:e11841. doi: 10.7717/peerj.11841 (PMC8320520; doi:10.7717/peerj.11841)
Supplement: Supplemental Information 9 [file peerj-09-11841-s009.xls]

## Sheet: Sample plates
							Group	Wells	Info
	Plate layout						NoSpi2	2	Amplicons VE24
							C	8	Extraction Controls
		PLATE III	First halve				.._O/F	22	Samples Jukka
		P5_BF2_E	P5_BF2_F	P5_BF2_W	P5_BF2_Y		B/G/F..	44	Lamps (BIO)
		H	G	F	E		CWBC....	6	Andy DNA extracts
	P7_BR2_2	C01	01_F	02_F	03_F		L..	13	Lamps Ontario
	P7_BR2_3	08_F	09_F	10_F	11_F		BLANK	1
	P7_BR2_4	04_O	05_O	06_O	C02
	P7_BR2_5	11_O	B01	B02	B03
	P7_BR2_6	B07	C04	B08	B09
	P7_BR2_B	B14	B15	B16	B17
	P7_BR2_C	G04	G05	C05	G06
	P7_BR2_D	G11	G12	G13	G14
	P7_BR2_E	F03	F04	F05	F06
	P7_BR2_F	F10	F11	F12	CWBC590
	P7_BR2_X	CWBC1652	CWBC1896	L01	L02
	P7_BR2_Z	L23	L26	L27	L38
		PLATE III	Second halve
		P5_BR2_E	P5_BR2_F	P5_BR2_X	P5_BR2_Z
		D	C	B	A
	P7_BF2_2	04_F	05_F	06_F	07_F
	P7_BF2_T	01_O	02_O	03_O	L24
	P7_BF2_4	07_O	08_O	09_O	10_O
	P7_BF2_5	B04	C03	B05	B06
	P7_BF2_6	B10	B11	B12	B13
	P7_BF2_B	L14	G01	G02	G03
	P7_BF2_C	G07	G08	G09	G10
	P7_BF2_D	G15	F01	C06	F02
	P7_BF2_E	C07	F07	F08	F09
	P7_BF2_F	CWBC777	CWBC1275	CWBC1598	C08
	P7_BF2_W	L04	L06	L11	BLANK
	P7_BF2_Y	L43	L46	NoSpi2_mock	NoSpi2_malaise

## Sheet: Plate III
ID	Position	Primer_combination	Sample_name
iii1	A01	0	0
iii2	A02	0	0
iii3	A03	0	0
iii4	A04	0	0
iii5	A05	0	0
iii6	A06	0	0
iii7	A07	0	0
iii8	A08	0	0
iii9	A09	0	0
iii10	A10	0	0
iii11	A11	0	0
iii12	A12	0	0
iii13	B01	0	0
iii14	B02	0	0
iii15	B03	0	0
iii16	B04	0	0
iii17	B05	0	0
iii18	B06	0	0
iii19	B07	0	0
iii20	B08	0	0
iii21	B09	0	0
iii22	B10	0	0
iii23	B11	0	0
iii24	B12	0	0
iii25	C01	0	0
iii26	C02	0	0
iii27	C03	0	0
iii28	C04	0	0
iii29	C05	0	0
iii30	C06	0	0
iii31	C07	0	0
iii32	C08	0	0
iii33	C09	0	0
iii34	C10	0	0
iii35	C11	0	0
iii36	C12	0	0
iii37	D01	0	0
iii38	D02	0	0
iii39	D03	0	0
iii40	D04	0	0
iii41	D05	0	0
iii42	D06	0	0
iii43	D07	0	0
iii44	D08	0	0
iii45	D09	0	0
iii46	D10	0	0
iii47	D11	0	0
iii48	D12	0	0
iii49	E01	0	0
iii50	E02	0	0
iii51	E03	0	0
iii52	E04	0	0
iii53	E05	0	0
iii54	E06	0	0
iii55	E07	0	0
iii56	E08	0	0
iii57	E09	0	0
iii58	E10	0	0
iii59	E11	0	0
iii60	E12	0	0
iii61	F01	0	0
iii62	F02	0	0
iii63	F03	0	0
iii64	F04	0	0
iii65	F05	0	0
iii66	F06	0	0
iii67	F07	0	0
iii68	F08	0	0
iii69	F09	0	0
iii70	F10	0	0
iii71	F11	0	0
iii72	F12	0	0
iii73	G01	0	0
iii74	G02	0	0
iii75	G03	0	0
iii76	G04	0	0
iii77	G05	0	0
iii78	G06	0	0
iii79	G07	0	0
iii80	G08	0	0
iii81	G09	0	0
iii82	G10	0	0
iii83	G11	0	0
iii84	G12	0	0
iii85	H01	0	0
iii86	H02	0	0
iii87	H03	0	0
iii88	H04	0	0
iii89	H05	0	0
iii90	H06	0	0
iii91	H07	0	0
iii92	H08	0	0
iii93	H09	0	0
iii94	H10	0	0
iii95	H11	0	0
iii96	H12	0	0

## Sheet: lab sheet
	Lamp survey
	H	G	F	E	D	C	B	A
1	0	0	0	0	0	0	0	0
2	0	0	0	0	0	0	0	0
3	0	0	0	0	0	0	0	0
4	0	0	0	0	0	0	0	0
5	0	0	0	0	0	0	0	0
6	0	0	0	0	0	0	0	0
7	0	0	0	0	0	0	0	0
8	0	0	0	0	0	0	0	0
9	0	0	0	0	0	0	0	0
10	0	0	0	0	0	0	0	0
11	0	0	0	0	0	0	0	0
12	0	0	0	0	0	0	0	0
